# Supplementary material for: Proteome Characteristics of Non-Alcoholic Steatohepatitis Liver Tissue and Associated Hepatocellular Carcinomas
Source: MDPI journal article supplement (doi:10.3390/ijms18020434), 2017-02-17
Supplement: s1 [file s1]

# Supplementary Materials: Proteome Characteristics of Non-Alcoholic Steatohepatitis Liver Tissue and Associated Hepatocellular Carcinomas

Anna Kakehashi, Vasily E. Stefanov, Naomi Ishii, Takahiro Okuno, Hideki Fujii, Kazuaki Kawai, Norifumi Kawada and Hideki Wanibuchi

**Table S1.** Clinicopathological features, tumor and treatment characteristics for NASH-associated and HCV+ HCC cancer patients.

|                               |              | NASH HCC            |    |     | HCV+ HCC           |    |     | Metastatic tum. Normal Liver |   |    |
|-------------------------------|--------------|---------------------|----|-----|--------------------|----|-----|------------------------------|---|----|
|                               |              | Median (Range)      | N  | %   | Median (Range)     | N  | %   | Median (Range)               | N | %  |
| <b>Patient demographics</b>   |              |                     |    |     |                    |    |     |                              |   |    |
| Gender                        | Male         |                     | 8  | 80  |                    | 6  | 60  |                              | 7 | 70 |
|                               | Female       |                     | 2  | 20  |                    | 4  | 40  |                              | 3 | 30 |
| Cirrhosis stage               | 1            |                     | 2  | 20  |                    | 1  | 10  |                              | 0 | 0  |
|                               | 2            |                     | 6  | 60  |                    | 5  | 50  |                              | 1 | 10 |
|                               | 3            |                     | 1  | 10  |                    | 1  | 10  |                              | 0 | 0  |
|                               | 4            |                     | 1  | 10  |                    | 3  | 30  |                              | 0 | 0  |
| Age (y)                       | >70          | 75.2 (71–79)        | 4  | 40  | 75.2 (71–84)       | 4  | 40  | 74.0 (71–77)                 | 2 | 20 |
|                               | ≤70          | 63.8 (54–69)        | 6  | 60  | 61.0 (45–67)       | 6  | 60  | 59.9(47–69)                  | 8 | 80 |
| BMI                           | 15–24        | 0 (0)               | 0  | 0   | 21.3 (15.7–24.0)   | 8  | 80  | 22.1 (18.4–24.0)             | 7 | 70 |
|                               | >25          | 28.1 (25.6–31.0)    | 10 | 100 | 27.4 (25.9–28.8)   | 2  | 20  | 25.9 (25.1–26.4)             | 3 | 30 |
| Diabetes                      | Positive     |                     | 7  | 70  |                    | 1  | 10  |                              | 2 | 20 |
|                               | Negative     |                     | 3  | 30  |                    | 9  | 90  |                              | 8 | 80 |
| Alcohol                       | Drinker      |                     | 0  | 0   |                    | 3  | 30  |                              | 8 | 80 |
|                               | Non-drinker  |                     | 10 | 100 |                    | 7  | 70  |                              | 2 | 20 |
| Smoking                       | Smoker       |                     | 7  | 70  |                    | 8  | 80  |                              | 4 | 40 |
|                               | Non-smoker   |                     | 3  | 30  |                    | 2  | 20  |                              | 6 | 60 |
| AST                           | 13–33 IU/L;  |                     | 6  | 60  |                    | 4  | 40  |                              | 5 | 50 |
|                               | >34 IU/L     |                     | 4  | 40  |                    | 6  | 60  |                              | 5 | 50 |
| ALT                           | 6–27 IU/L    |                     | 6  | 60  |                    | 3  | 30  |                              | 3 | 30 |
|                               | >28 IU/L     |                     | 4  | 40  |                    | 7  | 70  |                              | 7 | 70 |
| ALP                           | 115–359 IU/L |                     | 7  | 70  |                    | 9  | 90  |                              | 6 | 60 |
|                               | >360 IU/L    |                     | 3  | 30  |                    | 1  | 10  |                              | 4 | 40 |
| <b>Tumor characteristics</b>  |              |                     |    |     |                    |    |     |                              |   |    |
| Tumor size (cm <sup>3</sup> ) | ≤3           | 2.4 (0.59–2.73)     | 3  | 30  | 0.9 (0.14–2.25)    | 6  | 60  | 0.4 (0.13–0.97)              | 6 | 60 |
|                               | >3           | 100.4 (3.38– 367.5) | 7  | 70  | 46.6 (3.00– 10.00) | 4  | 40  | 46.6 (11.39– 101.25)         | 4 | 40 |
| Depth of tumor invasion       | T1           |                     | 1  | 10  |                    | 4  | 40  |                              | 0 | 0  |
|                               | T2           |                     | 3  | 30  |                    | 2  | 20  |                              | 3 | 30 |
|                               | T3           |                     | 4  | 40  |                    | 3  | 30  |                              | 3 | 30 |
|                               | T4           |                     | 2  | 20  |                    | 1  | 10  |                              | 4 | 40 |
| Differentiation               | Well         |                     | 0  | 0   |                    | 0  | 0   |                              | 0 | 0  |
|                               | Moderate     |                     | 10 | 100 |                    | 10 | 100 |                              | 7 | 70 |
|                               | Poor         |                     | 0  | 0   |                    | 0  | 0   |                              | 3 | 30 |
| Clinical stage                | I            |                     | 1  | 10  |                    | 4  | 40  |                              | 0 | 0  |
|                               | II           |                     | 3  | 30  |                    | 2  | 20  |                              | 3 | 30 |
|                               | III          |                     | 4  | 40  |                    | 3  | 30  |                              | 3 | 30 |
|                               | IV           |                     | 2  | 20  |                    | 1  | 10  |                              | 4 | 40 |
| Venous invasion               | Positive     |                     | 4  | 40  |                    | 2  | 20  |                              | - | -  |
|                               | Negative     |                     | 6  | 60  |                    | 8  | 80  |                              | - | -  |
| Recurrence                    | Positive     |                     | 6  | 60  |                    | 4  | 40  |                              | 5 | 50 |
|                               | Negative     |                     | 4  | 40  |                    | 6  | 60  |                              | 5 | 50 |
| Distant metastasis, pM        | Positive     |                     | 0  | 0   |                    | 1  | 10  |                              | 6 | 60 |
|                               | Negative     |                     | 10 | 100 |                    | 9  | 90  |                              | 4 | 40 |
| Bile duct invasion, pB        | Positive     |                     | 1  | 10  |                    | 0  | 0   |                              | - | -  |
|                               | Negative     |                     | 9  | 90  |                    | 10 | 100 |                              | - | -  |
| Formation of capsule          | Present      |                     | 7  | 70  |                    | 7  | 70  |                              | - | -  |
|                               | Absent       |                     | 3  | 30  |                    | 3  | 30  |                              | - | -  |
| Infiltration to capsule       | Positive     |                     | 6  | 60  |                    | 6  | 60  |                              | - | -  |
|                               | Negative     |                     | 4  | 40  |                    | 4  | 40  |                              | - | -  |

Table S1. Cont.

|                           |       | NASH HCC       |    | HCV+ HCC       |     | Metastatic tum. Normal Liver |    |
|---------------------------|-------|----------------|----|----------------|-----|------------------------------|----|
|                           |       | Median (Range) | N  | Median (Range) | N   | Median (Range)               | N  |
| Treatment characteristics |       |                |    |                |     |                              |    |
| Neoadjuvant therapy       | Yes   | 3              | 30 | 2              | 20  | 9                            | 90 |
|                           | No    | 7              | 70 | 8              | 80  | 1                            | 10 |
| Radiation therapy         | Yes   | 3              | 30 | 2              | 20  | 2                            | 20 |
|                           | No    | 7              | 70 | 8              | 80  | 8                            | 80 |
| Surgical resection        | Lobe  | 2              | 20 | 0              | 0   | 4                            | 40 |
|                           | Wedge | 8              | 80 | 10             | 100 | 6                            | 60 |

Tumor volume was counted as length/2 \* (width/2) \* (width/2) and expressed in cm<sup>3</sup>; B, Brunt Criteria.

Table S2. Clinicopathological characteristics of NASH biopsy patients.

|                                           |              | NASH Biopsy      |     |
|-------------------------------------------|--------------|------------------|-----|
|                                           |              | Median (Range)   | %   |
| Patient demographics                      |              |                  |     |
| Gender                                    | Male         |                  | 20  |
|                                           | Female       |                  | 80  |
| Age (y)                                   | >70          | 71 (71–71)       | 20  |
|                                           | ≤70          | 59.6 (47–68)     | 80  |
| BMI                                       | 15–24        | 0                | 10  |
|                                           | >25          | 28.7 (25.0–35.6) | 90  |
| Diabetes                                  | Positive     |                  | 60  |
|                                           | Negative     |                  | 40  |
| Alcohol                                   | Drinker      |                  | 0   |
|                                           | Non-drinker  |                  | 100 |
| AST                                       | 13–33 IU/L ; | 0                | 0   |
|                                           | >34 IU/L     | 57.7 (34–74)     | 100 |
| ALT                                       | 6–27 IU/L    | 0                | 0   |
|                                           | >28 IU/L     | 54.2 (31–93)     | 100 |
| ALP                                       | 115–359 IU/L | 226.1 (169–331)  | 90  |
|                                           | >360 IU/L    | 257 (169–472)    | 10  |
| GGT                                       |              | 88.9 (48–256)    | 100 |
| Alb                                       |              | 3.6 (3.0–4.2)    | 100 |
| T-bil                                     |              | 1.3 (0.6–1.8)    | 100 |
| D-bil                                     |              | 0.4 (0.2–0.8)    | 100 |
| TG                                        |              | 130 (60–217)     | 100 |
| Accumulation of lipids in hepatocytes     | grade 1      |                  | 60  |
|                                           | grade 2      |                  | 40  |
| Inflammation                              | grade 2      |                  | 100 |
|                                           | grade 3      |                  |     |
| Hepatocytes ballooning                    | grade 1      |                  | 10  |
|                                           | grade 2      |                  | 90  |
|                                           | grade 3      |                  | 10  |
|                                           | grade 4      |                  | 0   |
| NAS                                       | grade 5      |                  | 40  |
|                                           | grade 6      |                  | 20  |
|                                           | grade 7      |                  | 30  |
|                                           | grade 1      |                  | 30  |
| Accumulation of lipids in hepatocytes (B) | grade 2      |                  | 50  |
|                                           | grade 3      |                  | 20  |
|                                           | grade 2      |                  | 50  |
| Inflammation (B)                          | grade 3      |                  | 50  |
|                                           | grade 4      |                  | 100 |
| Fibrosis (B)                              |              |                  | 100 |
| Matteoni                                  | grade 4      |                  | 100 |

B, Brunt's criteria.

**Table S6.** Incidence and multiplicity of PPFs and liver tumors in STAM mice.

| <b>Lesion</b> | <b>No. mice</b> | <b>Incidence (%)</b> | <b>Multiplicity (No./mouse)</b> |
|---------------|-----------------|----------------------|---------------------------------|
| PPF           |                 |                      |                                 |
| Basophilic    | 7               | 7 (100)              | 2.71 ± 2.43                     |
| Eosinophilic  | 7               | 6 (85.7)             | 1.86 ± 1.35                     |
| Mixed type    | 7               | 6 (85.7)             | 4.71 ± 5.28                     |
| Vacuolated    | 7               | 2 (28.6)             | 2.43 ± 6.00                     |
| Total         | 7               | 7 (100)              | 11.71 ± 9.64                    |
| HCA           | 7               | 7 (100)              | 6.86 ± 8.67                     |
| HCC           | 7               | 2 (28.6)             | 0.43 ± 0.79                     |
| Total tumors  | 7               | 7 (100)              | 6.57 ± 8.42                     |

PPF, proliferative preneoplastic foci.
